# Supplementary material for: Genetic Dissection of Hybrid Performance and Heterosis for Yield-Related Traits in Maize
Source: Front Plant Sci. 2021 Nov 30;12:774478. doi: 10.3389/fpls.2021.774478 (PMC8670227; doi:10.3389/fpls.2021.774478)
Supplement: Supplementary Table 5 — QTL mapping results for 10 traits in the recombinant inbred line population developed by Ye478 × Qi319 (RIL), Chang7-2 × RIL (TC), Mo17 × RIL (TM) populations, the pooled TC-TM population and heterosis dataset. [file Table_5.xlsx]

## Sheet: Sheet1
Supplementary Table 5 | QTL mapping results for 10 traits in the recombinant inbred line population developed by Ye478 × Qi319 (RIL), Chang7-2 × RIL (TC), Mo17 × RIL (TM) populations, the pooled TC-TM population and heterosis dataset
Dataset	Trait	QTL	PeakSNP	Chromosome	Position(cM)	LOD	Interval(cM)	Interval(Mb)	Effect	PVE	Meta-QTL
RIL	PH	RIL-qPH2	Chr2_200090030	2	220.663	2.68609	214.27-230.33	195.23-205.91	-4.05901	0.0368286	MQTL12
	PH	RIL-qPH3	Chr3_208586873	3	179.037	2.78868	169.17-183.97	204.25-210.77	4.54501	0.038208	MQTL17
	PH	RIL-qPH6	Chr6_98539147	6	55.2734	2.51658	53.61-58	98.07-99.51	-4.31608	0.0345451	MQTL30
	PH	RIL-qPH7	Chr7_2280880	7	9.692	2.50169	0-13.42	0.08-2.73	-2.97404	0.0343442	MQTL32
	KNPR	RIL-qKNPR1	Chr1_218758202	1	187.549	2.51828	186.06-189.07	217.46-220.35	-0.943652	0.034568	MQTL5
	KT	RIL-qKT8-1	Chr8_7961379	8	29.9064	3.93646	26.89-34.59	7.25-8.75	-1.08359	0.0535065	MQTL36
	KT	RIL-qKT8-2	Chr8_86194088	8	85.6594	2.50903	75.88-92.66	76.27-97.55	-1.20514	0.0344432	MQTL37
	KW	RIL-qKW1	Chr1_17945477	1	62.901	3.2862	59.75-62.9	14.59-17.95	-0.917165	0.0448695	MQTL1
	KW	RIL-qKW3-1	Chr3_113481902	3	93.1754	3.05963	93.18-93.18	113.48-113.48	0.800609	0.0418416	MQTL14
	KW	RIL-qKW3-2	Chr3_170015303	3	116.288	3.51915	111.31-120.21	167.93-171.73	1.38447	0.0479726	MQTL15
	KW	RIL-qKW3-3	Chr3_175833524	3	127.461	2.91438	117.48-135.06	170.74-180.46	1.27369	0.0398954	MQTL15
	KL	RIL-qKL3	Chr3_218518879	3	203.583	2.72259	195.32-210.58	215.43-220.86	1.29829	0.0373195	MQTL18
	VW	RIL-qVW10-1	Chr10_1587067	10	3.0741	2.80281	0-9.66	0.12-2.25	-6.52494	0.0383978	MQTL41
	VW	RIL-qVW10-2	Chr10_3370658	10	22.7955	2.95487	13.24-29.63	2.75-4.48	-7.19087	0.0404383	MQTL42
	HGW	RIL-qHGW3	Chr3_169807999	3	115.992	3.27478	106.06-120.21	162.93-171.73	0.872614	0.044717	MQTL15
	HGW	RIL-qHGW4	Chr4_3456791	4	11.2051	2.59438	5.1-15.44	1.81-4.34	-0.595728	0.0355938	MQTL19
	GY	RIL-qGY2	Chr2_184507092	2	190.85	2.61649	181.05-195.54	176.44-186.58	-3.06064	0.0358916	MQTL11
TC	PH	TC-qPH1	Chr1_131115160	1	93.618	3.42631	91.84-101.67	116.12-171.61	-2.18274	0.0470153	MQTL2		-
	PH	TC-qPH10	Chr10_83376820	10	116.808	3.77546	115.75-124.64	82.55-90.89	-3.52455	0.0516803	MQTL43
	EH	TC-qEH1	Chr1_131115160	1	93.618	6.55153	91.84-98.5	116.12-166.36	-2.1258	0.0879686	MQTL2
	EH	TC-qEH10	Chr10_91890676	10	124.34	3.77316	116.05-126.9	82.81-99.02	-2.67981	0.0516496	MQTL43
	RNPE	TC-qRNPE1	Chr1_17945477	1	62.901	3.0602	55.28-62.9	13.18-17.95	0.127402	0.0420989	MQTL1
	RNPE	TC-qRNPE2	Chr2_3600838	2	20.5345	3.20544	14.47-23.18	2.81-3.95	0.150278	0.0440523	MQTL9
	RNPE	TC-qRNPE4	Chr4_8133804	4	37.9131	3.23222	34.71-40.9	7.33-10.62	0.181579	0.044412	MQTL20
	KNPR	TC-qKNPR1	Chr1_17945477	1	62.901	2.51089	55.28-62.9	13.18-17.95	-0.305164	0.0346748	MQTL1
	KT	TCqKT1	Chr1_274083245	1	251.44	2.80876	249.15-257.43	272.9-278.73	-0.555006	0.0387077	MQTL7
	KT	TC-qKT2	Chr2_2611883	2	12.9387	5.32372	9.9-14.47	2.36-2.81	-0.515807	0.0720935	MQTL8
	KW	TC-qKW3	Chr3_162927735	3	106.064	3.16565	106.06-112.98	162.93-168.62	0.559533	0.0435176	MQTL15
	KW	TC-qKW7	Chr7_132116933	7	124.957	3.94796	121.16-126.3	130.41-133.11	1.01507	0.0539767	MQTL33
	KL	TC-qKL2-1	Chr2_2345147	2	9.7504	5.12683	7.61-11.42	1.77-2.56	1.05384	0.0695221	MQTL8
	KL	TC-qKL2-2	Chr2_4167612	2	24.5406	2.71891	16.81-30.51	3.24-4.67	0.755514	0.037493	MQTL9
	HGW	TC-qHGW3	Chr3_162927735	3	106.064	2.7069	106.06-115.69	162.93-169.4	0.32432	0.0373305	MQTL15
	GY	TC-qGY1	Chr1_202354599	1	162.221	2.70244	153.78-165.34	197.92-202.9	-2.48242	0.0372701	MQTL3
	GY	TC-qGY7-1	Chr7_177956978	7	235.836	2.89483	226.85-241.19	176.46-179.17	2.08725	0.0398699	MQTL34
	GY	TC-qGY7-2	Chr7_180852045	7	257.72	2.71283	249.22-259.36	179.35-181.21	1.99365	0.0374107	MQTL35
TM	PH	TM-qPH1	Chr1_131115160	1	93.618	2.66677	91.84-103.01	116.12-172.23	-1.92502	0.0368978	MQTL2
	PH	TM-qPH2	Chr2_196437882	2	216.27	2.55822	208.19-222.99	191.68-200.97	-2.13176	0.0354228	MQTL12
	PH	TM-qPH5	Chr5_192334248	5	230.912	2.70045	226.54-235.27	189.14-195.29	-2.46885	0.037355	MQTL27
	EH	TM-qEH1	Chr1_116118501	1	91.8373	7.42674	91.84-98.5	116.12-166.36	-2.06636	0.0994064	MQTL2
	EH	TM-qEH3	Chr3_113481902	3	93.1754	2.5046	93.18-93.18	113.48-113.48	0.969588	0.0346933	MQTL14
	EH	TM-qEH10	Chr10_91890676	10	124.34	3.56475	123.14-126.01	87.82-97.83	-2.6948	0.0490135	MQTL43
	KNPR	TM-qKNPR1	Chr1_212209325	1	179.946	3.31868	178.74-180.84	211.75-212.83	-0.769238	0.0457087	MQTL4
	KNPR	TM-qKNPR2	Chr2_3946389	2	23.1767	2.58985	19.63-30.51	3.58-4.67	-0.438682	0.0358528	MQTL9
	KT	TM-qKT2	Chr2_2330262	2	9.4536	2.96679	3.39-14.47	1.54-2.81	-0.468905	0.0409628	MQTL8
	KT	TM-qKT4	Chr4_181357928	4	157.618	2.7518	150.65-157.77	176.64-181.46	-0.443043	0.0380517	MQTL22
	KT	TM-qKT5	Chr5_215345052	5	291.051	2.71109	288.31-295.94	214.54-217.13	0.482096	0.0374994	MQTL28
	KW	TM-qKW3	Chr3_113481902	3	93.1754	5.19139	93.18-93.18	113.48-113.48	0.614177	0.0705735	MQTL14
	KL	TM-qKL2	Chr2_2345147	2	9.7504	4.41925	6.23-16.81	1.71-3.24	0.922013	0.0604009	MQTL9
	KL	TM-qKL3	Chr3_113481902	3	93.1754	2.86688	93.18-93.18	113.48-113.48	0.589878	0.0396111	MQTL14
	HGW	TM-qHGW3-1	Chr3_113481902	3	93.1754	4.97371	93.18-93.18	113.48-113.48	0.39409	0.0677169	MQTL14
	HGW	TM-qHGW3-2	Chr3_167926543	3	111.31	3.20012	106.06-121.25	162.93-172.23	0.457057	0.0441122	MQTL15
	HGW	TM-qHGW3-3	Chr3_184939933	3	141.556	3.25545	135.06-142.46	180.46-185.93	0.514035	0.0448576	MQTL16
	GY	TM-qGY1	Chr1_14555419	1	59.6027	2.85027	55.28-62.9	13.18-17.95	-1.81847	0.0393861	MQTL1
	GY	TM-qGY10	Chr10_84182633	10	118.599	2.6784	114.26-126.01	80.24-97.83	-2.93204	0.0370557	MQTL43
MPH	EH	MPH-qEH5	Chr5_4112891	5	20.9519	2.83593	19.9-26.45	4.1-5.14	3.84721	0.0197918	MQTL23
	EH	MPH-qEH10	Chr10_98173524	10	126.155	2.63282	116.81-134.95	83.38-112.87	6.53167	0.0183874	MQTL43
	RNPE	MPH-qRNPE2	Chr2_9552706	2	52.0373	2.86502	47.69-54.47	8.97-10.13	0.366302	0.0194053	MQTL10
	RNPE	MPH-qRNPE4	Chr4_181357928	4	157.618	2.57537	150.65-157.77	176.64-181.46	0.328758	0.0174607	MQTL22
	RNPE	MPH-qRNPE9	Chr9_2916201	9	4.1792	3.72015	1.19-4.93	1.68-3.45	0.507849	0.0251239	MQTL39
	KNPR	MPH-qKNPR1	Chr1_243605395	1	212.439	3.31192	212.29-213.8	243.32-244.21	2.23426	0.0223981	MQTL6
	KNPR	MPH-qKNPR8	Chr8_89721713	8	87.8739	2.8924	80.97-95.8	82.47-97.62	2.04094	0.0195889	MQTL37
	KT	MPH-qKT6	Chr6_136275290	6	110.458	3.27542	108.66-111.82	135.25-136.58	2.43189	0.0222192	MQTL31
	KW	MPH-qKW4	Chr4_146026116	4	120.089	2.97935	119.94-123.23	145.71-149.08	3.40197	0.0201718	MQTL21
	KL	MPH-qKL5	Chr5_153800729	5	183.667	2.65303	180.85-184.87	151.47-154.45	3.82351	0.0179297	MQTL26
	KL	MPH-qKL7	Chr7_1325354	7	2.7279	2.64842	0-9.69	0.08-2.28	1.90749	0.0178988	MQTL32
	KL	MPH-qKL9	Chr9_2349198	9	2.985	2.8881	1.19-4.93	1.68-3.45	2.73392	0.0195028	MQTL39
	HGW	MPH-qHGW1	Chr1_280194451	1	259.572	2.84006	255.79-260.76	277.45-280.78	1.31581	0.0193516	MQTL7
	GY	MPH-qGY5	Chr5_35603157	5	99.9075	2.55593	99.61-100.2	33.19-36.18	9.2782	0.0172792	MQTL24
	GY	MPH-qGY5-2	Chr5_137848945	5	169.385	2.82434	162.07-171.02	126.17-140.07	12.5495	0.0190764	MQTL25
	GY	MPH-qGY8	Chr8_155368444	8	153.64	3.20994	152.45-155.61	154.42-156.13	8.27242	0.0216524	MQTL38
	GY	MPH-qGY10	Chr10_83376820	10	116.808	2.65737	114.12-126.45	80.08-98.89	8.64625	0.0179588	MQTL43
TC-TM-Main	PH	TC-TM-Main-qPH1	Chr1_131115160	1	93.618	3.91063	91.84-98.5	116.12-166.36	12.7348	0.0271483	MQTL2
	PH	TC-TM-Mainq-PH10	Chr10_91890676	10	124.34	3.01883	115.75-128.54	82.55-103.32	11.9562	0.0210229	MQTL43
	EH	TC-TM-Main-qEH1	Chr1_131115160	1	93.618	7.37472	91.84-98.5	116.12-166.36	-11.7323	0.0505805	MQTL2
	EH	TC-TM-Main-qEH3	Chr3_113481902	3	93.1754	2.76812	93.18-93.18	113.48-113.48	-12.1921	0.019294	MQTL14
	EH	TC-TM-Main-qEH10	Chr10_91890676	10	124.34	4.43945	123.14-126.01	87.82-97.83	-12.5887	0.0307625	MQTL43
	RNPE	TC-TM-Main-qRNPE2	Chr2_3580660	2	19.6307	2.76569	14.47-24.54	2.81-4.17	-1.69299	0.0192772	MQTL9
	KNPR	TC-TM-Main-qKNPR2	Chr2_210873206	2	234.063	2.66348	233.47-235.11	210.29-211.57	1.35094	0.0185714	MQTL13
	KT	TC-TM-Main-qKT2-1	Chr2_2559872	2	11.4185	4.29153	3.39-12.94	1.54-2.61	5.41276	0.0297529	MQTL8
	KT	TC-TM-Main-qKT2-2	Chr2_2611883	2	12.9387	4.68772	7.61-14.47	1.77-2.81	4.43962	0.0324546	MQTL8
	KT	TC-TM-Main-qKT9	Chr9_17233316	9	50.3169	3.14159	46.71-51.99	16.42-17.8	5.38553	0.0218684	MQTL40
	KW	TC-TM-Main-qKW3	Chr3_113481902	3	93.1754	3.70135	93.18-93.18	113.48-113.48	-0.335204	0.0257144	MQTL14
	KW	TC-TM-Main-qKW3-2	Chr3_167926543	3	111.31	3.21574	106.06-115.25	162.93-169.24	-0.36188	0.0223787	MQTL15
	KW	TC-TM-Main-qKW7	Chr7_132116933	7	124.957	3.13073	121.16-126.3	130.41-133.11	-0.308368	0.0217936	MQTL33
	KL	TC-TM-Main-qKL2-1	Chr2_2345147	2	9.7504	5.70502	7.61-11.42	1.77-2.56	-5.36067	0.0393574	MQTL8
	KL	TC-TM-Main-qKL2-2	Chr2_4167612	2	24.5406	2.51692	16.81-30.51	3.24-4.67	-5.33079	0.0175585	MQTL9
	VW	TC-TM-Main-qVW6	Chr6_1307898	6	2.2577	2.52769	0-9.4	0.18-4	8.59707	0.017633	MQTL29
	HGW	TC-TM-Main-qHGW1	Chr1_202354599	1	162.221	3.08246	160.7-165.19	201.87-202.82	1.6283	0.0214612	MQTL3
	HGW	TC-TM-Main-qHGW3-1	Chr3_113481902	3	93.1754	3.26164	93.18-93.18	113.48-113.48	1.62411	0.0226945	MQTL14
	HGW	TC-TM-Main-qHGW3-2	Chr3_162927735	3	106.064	2.64956	106.06-115.99	162.93-169.81	1.61762	0.0184752	MQTL15
	HGW	TC-TM-Main-qHGW4	Chr4_4467955	4	15.7335	2.69954	7.59-18.38	2.67-4.84	1.62257	0.0188204	MQTL19
	GY	TC-TM-Main-qGY7	Chr7_180852045	7	257.72	2.66143	249.22-259.36	179.35-181.21	-4.98147	0.0185572	MQTL35
	GY	TC-TM-Main-qGY10	Chr10_83376820	10	116.808	3.16794	114.56-119.81	80.77-85.28	-5.02973	0.0220497	MQTL43
PH, plant height; EH, ear height; RNPE, row number per ear; KNPR, kernel number per row; KT, kernel thickness; KW, kernel width; KL, kernel length; VW, volume weight; HGW, hundred grain weight; GY, grain yield per plant; PeakSNP, the most significant SNP; QTL, quantitative trait loci; LOD, log of odds; Effect, allele effects; PVE, phenotypic variance explained.
TC-TM-Main is the mapping results for the additive and dominance effects of QTL from the pooled population of TC and TM; MPH represents the result of dominance QTL mapping for heterosis.
