# Supplementary material for: Genetic Dissection of Hybrid Performance and Heterosis for Yield-Related Traits in Maize
Source: Front Plant Sci. 2021 Nov 30;12:774478. doi: 10.3389/fpls.2021.774478 (PMC8670227; doi:10.3389/fpls.2021.774478)
Supplement: Supplementary Table 8 — Significant epistatic paired loci for 10 traits identified from the pooled Chang7-2 × RIL (TC)-Mo17 × RIL (TM) population. [file Table_8.xlsx]

## Sheet: Additive-by-additive
Supplementary Table 8 | Significant epistatic paired loci for 10 traits identified from the pooled Chang7-2 × RIL (TC)-Mo17 × RIL (TM) population
Traits	Peak SNP1	Peak SNP2	LOD	Effect	PVE
PH	Chr1_208982341	Chr5_213974881	5.93905	-3.33408	0.0409384
PH	Chr1_305468365	Chr3_113481902	5.72466	-6.70741	0.0394902
PH	Chr6_166754537	Chr8_180048590	5.61622	-6.68054	0.0387569
PH	Chr6_166754537	Chr8_180913576	5.61622	-6.68054	0.0387569
PH	Chr6_166754537	Chr8_181023046	5.61622	-6.68054	0.0387569
PH	Chr6_166754537	Chr8_180032314	5.45586	-6.59132	0.0376714
PH	Chr6_166587580	Chr8_180048590	5.39093	-6.56599	0.0372315
PH	Chr6_166587580	Chr8_180913576	5.39093	-6.56599	0.0372315
PH	Chr6_166587580	Chr8_181023046	5.39093	-6.56599	0.0372315
PH	Chr6_166754537	Chr8_180563277	5.28595	-6.45631	0.0365199
PH	Chr6_166754537	Chr8_180334237	5.28595	-6.45631	0.0365199
PH	Chr6_166754537	Chr8_180284778	5.28595	-6.45631	0.0365199
PH	Chr6_166754537	Chr8_180685249	5.28595	-6.45631	0.0365199
PH	Chr6_166754537	Chr8_179683376	5.27307	-6.51015	0.0364325
PH	Chr6_166754537	Chr8_179650511	5.27307	-6.51015	0.0364325
PH	Chr1_209994942	Chr5_213974881	5.21112	-3.11068	0.0360123
PH	Chr1_209387203	Chr5_213974881	5.21112	-3.11068	0.0360123
PH	Chr6_166587580	Chr8_180032314	5.21038	-6.45474	0.0360073
PH	Chr6_166812072	Chr8_180048590	5.08642	-6.33309	0.0351659
PH	Chr6_166812072	Chr8_180913576	5.08642	-6.33309	0.0351659
PH	Chr6_166812072	Chr8_181023046	5.08642	-6.33309	0.0351659
PH	Chr1_3006323	Chr7_3973704	5.08302	-6.19785	0.0351428
PH	Chr6_166587580	Chr8_180563277	5.07924	-6.35488	0.0351171
PH	Chr6_166587580	Chr8_180334237	5.07924	-6.35488	0.0351171
PH	Chr6_166587580	Chr8_180284778	5.07924	-6.35488	0.0351171
PH	Chr6_166587580	Chr8_180685249	5.07924	-6.35488	0.0351171
PH	Chr1_3169762	Chr7_3973704	5.07827	-6.1759	0.0351105
PH	Chr6_166482319	Chr8_180048590	5.06722	-6.37801	0.0350355
PH	Chr6_166482319	Chr8_180913576	5.06722	-6.37801	0.0350355
PH	Chr6_166482319	Chr8_181023046	5.06722	-6.37801	0.0350355
PH	Chr6_166587580	Chr8_179683376	5.03321	-6.37387	0.0348045
PH	Chr6_166587580	Chr8_179650511	5.03321	-6.37387	0.0348045
PH	Chr6_166812072	Chr8_179567637	5.02015	-6.31098	0.0347157
EH	Chr4_62864627	Chr7_179825283	5.82847	-2.23301	0.0401917
EH	Chr4_62864627	Chr7_179887014	5.80011	-2.2281	0.0400002
EH	Chr4_63100205	Chr7_179825283	5.77369	-2.22123	0.0398216
EH	Chr4_63228639	Chr7_179825283	5.77369	-2.22123	0.0398216
EH	Chr4_63100205	Chr7_179887014	5.74383	-2.21578	0.0396198
EH	Chr4_63228639	Chr7_179887014	5.74383	-2.21578	0.0396198
EH	Chr1_244943925	Chr7_179825283	5.60142	2.17029	0.0386567
EH	Chr1_244943925	Chr7_179887014	5.46663	2.14308	0.0377443
EH	Chr6_112919213	Chr7_179887014	5.42113	2.15421	0.0374361
EH	Chr6_112919213	Chr7_179825283	5.42097	2.15403	0.037435
EH	Chr2_2611883	Chr7_181105873	5.35369	2.14107	0.0369791
EH	Chr2_2611883	Chr7_181645810	5.2834	2.12604	0.0365026
EH	Chr2_2611883	Chr7_182177786	5.2834	2.12604	0.0365026
EH	Chr2_2611883	Chr7_181456952	5.2834	2.12604	0.0365026
EH	Chr2_2611883	Chr7_181209696	5.2834	2.12604	0.0365026
EH	Chr2_2611883	Chr7_181192775	5.27585	2.1235	0.0364513
EH	Chr1_198848770	Chr7_179887014	5.26132	2.10982	0.0363528
EH	Chr1_198848770	Chr7_179825283	5.25912	2.11134	0.0363379
EH	Chr1_198611195	Chr7_179825283	5.21905	2.10874	0.0360661
EH	Chr1_198666452	Chr7_179825283	5.21905	2.10874	0.0360661
EH	Chr1_198611195	Chr7_179887014	5.21726	2.10692	0.036054
EH	Chr1_198666452	Chr7_179887014	5.21726	2.10692	0.036054
EH	Chr2_2611883	Chr7_179887014	5.11311	2.0948	0.0353471
EH	Chr7_179887014	Chr10_149806775	5.10935	-2.09108	0.0353215
EH	Chr4_239915555	Chr7_179887014	5.05187	2.05957	0.0349312
EH	Chr7_179887014	Chr10_149761986	5.04534	-2.07748	0.0348869
EH	Chr7_179887014	Chr10_149771687	5.02801	-2.07425	0.0347692
EH	Chr1_198298285	Chr7_179887014	5.0168	2.06106	0.034693
EH	Chr1_198298285	Chr7_179825283	5.01311	2.06127	0.0346679
EH	Chr6_112240685	Chr7_179825283	5.01098	2.06061	0.0346534
EH	Chr6_112240685	Chr7_179887014	5.00504	2.06004	0.0346131
RNPE	Chr1_17945477	Chr4_155040877	5.80768	0.237662	0.0400513
RNPE	Chr1_17945477	Chr4_153918329	5.74575	0.236345	0.0396328
RNPE	Chr1_17945477	Chr4_154255944	5.74575	0.236345	0.0396328
RNPE	Chr1_17945477	Chr4_154488571	5.696	0.235393	0.0392964
RNPE	Chr1_17945477	Chr4_154633515	5.696	0.235393	0.0392964
RNPE	Chr1_17945477	Chr3_226576586	5.14252	0.224496	0.0355468
RNPE	Chr1_17945477	Chr3_226769587	5.14252	0.224496	0.0355468
RNPE	Chr1_14555419	Chr4_153918329	5.04051	0.223556	0.0348541
RNPE	Chr1_14555419	Chr4_154255944	5.04051	0.223556	0.0348541
KNPR	Chr2_211263116	Chr5_7144625	6.57181	-0.968426	0.0452001
KNPR	Chr2_211263116	Chr5_7137455	6.56215	-0.967256	0.0451352
KNPR	Chr2_211461059	Chr5_7144625	6.50506	-0.963672	0.0447514
KNPR	Chr2_211461059	Chr5_7137455	6.49764	-0.962667	0.0447015
KNPR	Chr2_210873206	Chr5_7144625	6.34342	-0.952097	0.0436641
KNPR	Chr2_210712821	Chr5_7144625	6.34342	-0.952097	0.0436641
KNPR	Chr2_210873206	Chr5_7137455	6.33114	-0.950749	0.0435814
KNPR	Chr2_210712821	Chr5_7137455	6.33114	-0.950749	0.0435814
KNPR	Chr2_211263116	Chr5_6941327	6.08617	-0.927658	0.041931
KNPR	Chr2_211461059	Chr5_6941327	6.0281	-0.923263	0.0415394
KNPR	Chr2_216908455	Chr5_7144625	5.94828	-0.925435	0.0410008
KNPR	Chr2_216908455	Chr5_7137455	5.93864	-0.924568	0.0409357
KNPR	Chr2_210873206	Chr5_6941327	5.85919	-0.91049	0.0403992
KNPR	Chr2_210712821	Chr5_6941327	5.85919	-0.91049	0.0403992
KNPR	Chr2_211263116	Chr5_7383791	5.80984	-0.917052	0.0400659
KNPR	Chr2_211461059	Chr5_7383791	5.74793	-0.912228	0.0396475
KNPR	Chr2_210873206	Chr5_7383791	5.5931	-0.900477	0.0386004
KNPR	Chr2_210712821	Chr5_7383791	5.5931	-0.900477	0.0386004
KNPR	Chr2_216908455	Chr5_6941327	5.46348	-0.882068	0.037723
KNPR	Chr1_198848770	Chr5_6941327	5.37095	0.863525	0.0370961
KNPR	Chr2_216908455	Chr5_7383791	5.2232	-0.870213	0.0360943
KNPR	Chr1_286584876	Chr5_195640474	5.01638	-0.920017	0.0346901
KNPR	Chr1_286680671	Chr5_195640474	5.01638	-0.920017	0.0346901
KT	Chr4_190902114	Chr7_167509117	5.59136	0.873685	0.0385887
KT	Chr4_190902114	Chr7_166721608	5.52061	0.857064	0.0381098
KT	Chr4_190902114	Chr7_167225090	5.46577	0.857349	0.0377385
KT	Chr4_190902114	Chr7_167278919	5.29425	0.845409	0.0365761
KT	Chr4_190902114	Chr7_165634459	5.24583	0.835999	0.0362478
KT	Chr4_193980941	Chr7_166721608	5.22407	0.837232	0.0361002
KT	Chr4_190902114	Chr7_167036413	5.18461	0.832224	0.0358324
KT	Chr1_131115160	Chr4_3456791	5.17202	1.39152	0.035747
KT	Chr4_181357928	Chr7_167509117	5.10125	0.797403	0.0352666
KT	Chr4_181357928	Chr7_167225090	5.09104	0.792588	0.0351973
KT	Chr1_214378315	Chr4_190902114	5.02823	-0.830012	0.0347706
KT	Chr1_131115160	Chr4_3179162	5.02045	1.36936	0.0347178
KW	Chr3_233620658	Chr7_125520405	5.54691	-2.11082	0.0382878
KW	Chr3_233620658	Chr7_125547415	5.54691	-2.11082	0.0382878
KW	Chr3_233620658	Chr7_126298818	5.52556	-2.09836	0.0381434
KW	Chr3_233248082	Chr7_125520405	5.4191	-2.07548	0.0374223
KW	Chr3_233248082	Chr7_125547415	5.4191	-2.07548	0.0374223
KW	Chr3_233620658	Chr7_125165529	5.40901	-2.08398	0.037354
KW	Chr1_268208046	Chr5_22416982	5.38848	-2.05189	0.0372149
KW	Chr1_268482555	Chr5_22416982	5.38848	-2.05189	0.0372149
KW	Chr1_268208046	Chr5_21977401	5.38848	-2.05189	0.0372149
KW	Chr1_268482555	Chr5_21977401	5.38848	-2.05189	0.0372149
KW	Chr1_268208046	Chr5_22604972	5.38848	-2.05189	0.0372149
KW	Chr1_268482555	Chr5_22604972	5.38848	-2.05189	0.0372149
KW	Chr1_269926887	Chr5_22416982	5.38383	-2.07445	0.0371834
KW	Chr1_269715813	Chr5_22416982	5.38383	-2.07445	0.0371834
KW	Chr1_269603736	Chr5_22416982	5.38383	-2.07445	0.0371834
KW	Chr1_269073912	Chr5_22416982	5.38383	-2.07445	0.0371834
KW	Chr1_269926887	Chr5_21977401	5.38383	-2.07445	0.0371834
KW	Chr1_269715813	Chr5_21977401	5.38383	-2.07445	0.0371834
KW	Chr1_269603736	Chr5_21977401	5.38383	-2.07445	0.0371834
KW	Chr1_269073912	Chr5_21977401	5.38383	-2.07445	0.0371834
KW	Chr1_269926887	Chr5_22604972	5.38383	-2.07445	0.0371834
KW	Chr1_269715813	Chr5_22604972	5.38383	-2.07445	0.0371834
KW	Chr1_269603736	Chr5_22604972	5.38383	-2.07445	0.0371834
KW	Chr1_269073912	Chr5_22604972	5.38383	-2.07445	0.0371834
KW	Chr1_272123432	Chr5_22416982	5.36635	-2.06009	0.0370649
KW	Chr1_272442307	Chr5_22416982	5.36635	-2.06009	0.0370649
KW	Chr1_272123432	Chr5_21977401	5.36635	-2.06009	0.0370649
KW	Chr1_272442307	Chr5_21977401	5.36635	-2.06009	0.0370649
KW	Chr1_272123432	Chr5_22604972	5.36635	-2.06009	0.0370649
KW	Chr1_272442307	Chr5_22604972	5.36635	-2.06009	0.0370649
KW	Chr3_233248082	Chr7_126298818	5.35223	-2.0506	0.0369692
KW	Chr3_233092097	Chr7_125520405	5.31872	-2.04045	0.0367421
KW	Chr3_233050669	Chr7_125520405	5.31872	-2.04045	0.0367421
KW	Chr3_233092097	Chr7_125547415	5.31872	-2.04045	0.0367421
KW	Chr3_233050669	Chr7_125547415	5.31872	-2.04045	0.0367421
KW	Chr3_233620658	Chr7_124134155	5.30609	-2.05737	0.0366564
KW	Chr1_270123370	Chr5_22416982	5.30341	-2.07224	0.0366382
KW	Chr1_270123370	Chr5_21977401	5.30341	-2.07224	0.0366382
KW	Chr1_270123370	Chr5_22604972	5.30341	-2.07224	0.0366382
KW	Chr3_233248082	Chr7_125165529	5.29859	-2.0501	0.0366056
KW	Chr3_233620658	Chr7_127203975	5.28768	-2.05405	0.0365316
KW	Chr1_272648854	Chr5_22416982	5.25831	-2.04262	0.0363324
KW	Chr1_272648854	Chr5_21977401	5.25831	-2.04262	0.0363324
KW	Chr1_272648854	Chr5_22604972	5.25831	-2.04262	0.0363324
KW	Chr3_233620658	Chr7_127573640	5.24467	-2.02645	0.0362399
KW	Chr3_231645980	Chr7_125520405	5.22411	-1.98917	0.0361004
KW	Chr3_231645980	Chr7_125547415	5.22411	-1.98917	0.0361004
KW	Chr3_233092097	Chr7_125165529	5.20146	-2.01549	0.0359467
KW	Chr3_233050669	Chr7_125165529	5.20146	-2.01549	0.0359467
KW	Chr3_231442371	Chr7_125520405	5.19899	-1.98216	0.03593
KW	Chr3_231492342	Chr7_125520405	5.19899	-1.98216	0.03593
KW	Chr3_231442371	Chr7_125547415	5.19899	-1.98216	0.03593
KW	Chr3_231492342	Chr7_125547415	5.19899	-1.98216	0.03593
KW	Chr3_233092097	Chr7_126298818	5.18447	-2.03285	0.0358315
KW	Chr3_233050669	Chr7_126298818	5.18447	-2.03285	0.0358315
KW	Chr3_233620658	Chr7_125938553	5.17734	-2.03929	0.0357831
KW	Chr3_233248082	Chr7_124134155	5.1679	-2.01608	0.035719
KW	Chr3_231645980	Chr7_125165529	5.16716	-1.97179	0.035714
KW	Chr3_231442371	Chr7_125165529	5.143	-1.96511	0.03555
KW	Chr3_231492342	Chr7_125165529	5.143	-1.96511	0.03555
KW	Chr3_233248082	Chr7_127203975	5.12863	-2.0095	0.0354524
KW	Chr3_231645980	Chr7_126298818	5.11762	-1.98744	0.0353777
KW	Chr1_270995706	Chr5_22416982	5.11156	-2.01735	0.0353365
KW	Chr1_270995706	Chr5_21977401	5.11156	-2.01735	0.0353365
KW	Chr1_270995706	Chr5_22604972	5.11156	-2.01735	0.0353365
KW	Chr3_233620658	Chr7_127645016	5.10777	-1.99544	0.0353108
KW	Chr3_233620658	Chr7_127589147	5.10777	-1.99544	0.0353108
KW	Chr3_233248082	Chr7_127573640	5.10249	-1.98721	0.035275
KW	Chr3_231442371	Chr7_126298818	5.0949	-1.98126	0.0352235
KW	Chr3_231492342	Chr7_126298818	5.0949	-1.98126	0.0352235
KW	Chr3_233092097	Chr7_124134155	5.0465	-1.97739	0.0348948
KW	Chr3_233050669	Chr7_124134155	5.0465	-1.97739	0.0348948
KW	Chr3_233248082	Chr7_125938553	5.03283	-1.9997	0.0348019
KW	Chr3_233475275	Chr7_125520405	5.01652	-2.00371	0.0346911
KW	Chr3_233475275	Chr7_125547415	5.01652	-2.00371	0.0346911
KW	Chr3_231645980	Chr7_124134155	5.01451	-1.93075	0.0346775
HGW	Chr3_168717038	Chr7_79201112	6.22436	0.81411	0.0428624
HGW	Chr3_170093484	Chr7_79201112	5.73694	0.782638	0.0395732
HGW	Chr3_169242303	Chr7_79201112	5.69578	0.779759	0.039295
HGW	Chr3_169316491	Chr7_79201112	5.69578	0.779759	0.039295
HGW	Chr3_170015303	Chr7_79201112	5.67113	0.778543	0.0391283
HGW	Chr3_169807999	Chr7_79201112	5.658	0.777492	0.0390395
HGW	Chr3_169397737	Chr7_79201112	5.60651	0.77286	0.0386911
HGW	Chr1_193192905	Chr3_185208635	5.20725	0.817981	0.035986
HGW	Chr1_193192905	Chr3_184939933	5.11233	0.807756	0.0353418
HGW	Chr1_193721409	Chr3_185208635	5.10908	0.811099	0.0353197
HGW	Chr1_192968583	Chr3_185208635	5.06193	0.80637	0.0349995
HGW	Chr1_193192905	Chr3_184593801	5.02078	0.801872	0.03472
HGW	Chr1_193721409	Chr3_184939933	5.01995	0.8014	0.0347144
PH, plant height; EH, ear height; RNPE, row number per ear; KNPR, kernel number per row; KT, kernel thickness; KW, kernel width; KL, kernel length; VW, volume weight; HGW, hundred grain weight; GY, grain yield per plant; LOD, log of odds; Effect, allele effects; PVE, phenotypic variance explained.

## Sheet: Additive-by-dominance
Traits	Peak SNP1	Peak SNP2	LOD	Effect	PVE
PH	Chr1_305468365	Chr3_113481902	5.72466	6.70741	0.0394902
PH	Chr6_166754537	Chr8_180048590	5.61622	-6.68054	0.0387569
PH	Chr6_166754537	Chr8_180913576	5.61622	-6.68054	0.0387569
PH	Chr6_166754537	Chr8_181023046	5.61622	-6.68054	0.0387569
PH	Chr6_166754537	Chr8_180032314	5.45586	-6.59132	0.0376714
PH	Chr6_166587580	Chr8_180048590	5.39093	-6.56599	0.0372315
PH	Chr6_166587580	Chr8_180913576	5.39093	-6.56599	0.0372315
PH	Chr6_166587580	Chr8_181023046	5.39093	-6.56599	0.0372315
PH	Chr6_166754537	Chr8_180563277	5.28595	-6.45631	0.0365199
PH	Chr6_166754537	Chr8_180334237	5.28595	-6.45631	0.0365199
PH	Chr6_166754537	Chr8_180284778	5.28595	-6.45631	0.0365199
PH	Chr6_166754537	Chr8_180685249	5.28595	-6.45631	0.0365199
PH	Chr6_166754537	Chr8_179683376	5.27307	-6.51015	0.0364325
PH	Chr6_166754537	Chr8_179650511	5.27307	-6.51015	0.0364325
PH	Chr6_166587580	Chr8_180032314	5.21038	-6.45474	0.0360073
PH	Chr6_166812072	Chr8_180048590	5.08642	-6.33309	0.0351659
PH	Chr6_166812072	Chr8_180913576	5.08642	-6.33309	0.0351659
PH	Chr6_166812072	Chr8_181023046	5.08642	-6.33309	0.0351659
PH	Chr1_3006323	Chr7_3973704	5.08302	-6.19785	0.0351428
PH	Chr6_166587580	Chr8_180563277	5.07924	-6.35488	0.0351171
PH	Chr6_166587580	Chr8_180334237	5.07924	-6.35488	0.0351171
PH	Chr6_166587580	Chr8_180284778	5.07924	-6.35488	0.0351171
PH	Chr6_166587580	Chr8_180685249	5.07924	-6.35488	0.0351171
PH	Chr1_3169762	Chr7_3973704	5.07827	-6.1759	0.0351105
PH	Chr6_166482319	Chr8_180048590	5.06722	-6.37801	0.0350355
PH	Chr6_166482319	Chr8_180913576	5.06722	-6.37801	0.0350355
PH	Chr6_166482319	Chr8_181023046	5.06722	-6.37801	0.0350355
PH	Chr6_166587580	Chr8_179683376	5.03321	-6.37387	0.0348045
PH	Chr6_166587580	Chr8_179650511	5.03321	-6.37387	0.0348045
PH	Chr6_166812072	Chr8_179567637	5.02015	-6.31098	0.0347157
EH	Chr4_62864627	Chr7_179825283	5.82847	2.23301	0.0401917
EH	Chr4_62864627	Chr7_179887014	5.80011	2.2281	0.0400002
EH	Chr4_63100205	Chr7_179825283	5.77369	2.22123	0.0398216
EH	Chr4_63228639	Chr7_179825283	5.77369	2.22123	0.0398216
EH	Chr4_63100205	Chr7_179887014	5.74383	2.21578	0.0396198
EH	Chr4_63228639	Chr7_179887014	5.74383	2.21578	0.0396198
EH	Chr1_244943925	Chr7_179825283	5.60142	-2.17029	0.0386567
EH	Chr1_244943925	Chr7_179887014	5.46663	-2.14308	0.0377443
EH	Chr6_112919213	Chr7_179887014	5.42113	-2.15421	0.0374361
EH	Chr6_112919213	Chr7_179825283	5.42097	-2.15403	0.037435
EH	Chr2_2611883	Chr7_181105873	5.35369	-2.14107	0.0369791
EH	Chr2_2611883	Chr7_181645810	5.2834	-2.12604	0.0365026
EH	Chr2_2611883	Chr7_182177786	5.2834	-2.12604	0.0365026
EH	Chr2_2611883	Chr7_181456952	5.2834	-2.12604	0.0365026
EH	Chr2_2611883	Chr7_181209696	5.2834	-2.12604	0.0365026
EH	Chr2_2611883	Chr7_181192775	5.27585	-2.1235	0.0364513
EH	Chr1_198848770	Chr7_179887014	5.26132	-2.10982	0.0363528
EH	Chr1_198848770	Chr7_179825283	5.25912	-2.11134	0.0363379
EH	Chr1_198611195	Chr7_179825283	5.21905	-2.10874	0.0360661
EH	Chr1_198666452	Chr7_179825283	5.21905	-2.10874	0.0360661
EH	Chr1_198611195	Chr7_179887014	5.21726	-2.10692	0.036054
EH	Chr1_198666452	Chr7_179887014	5.21726	-2.10692	0.036054
EH	Chr2_2611883	Chr7_179887014	5.11311	-2.0948	0.0353471
EH	Chr4_239915555	Chr7_179887014	5.05187	-2.05957	0.0349312
EH	Chr1_198298285	Chr7_179887014	5.0168	-2.06106	0.034693
EH	Chr1_198298285	Chr7_179825283	5.01311	-2.06127	0.0346679
EH	Chr6_112240685	Chr7_179825283	5.01098	-2.06061	0.0346534
EH	Chr6_112240685	Chr7_179887014	5.00504	-2.06004	0.0346131
KNPR	Chr2_211263116	Chr5_7144625	6.57181	-0.968426	0.0452001
KNPR	Chr2_211263116	Chr5_7137455	6.56215	-0.967256	0.0451352
KNPR	Chr2_211461059	Chr5_7144625	6.50506	-0.963672	0.0447514
KNPR	Chr2_211461059	Chr5_7137455	6.49764	-0.962667	0.0447015
KNPR	Chr2_210873206	Chr5_7144625	6.34342	-0.952097	0.0436641
KNPR	Chr2_210712821	Chr5_7144625	6.34342	-0.952097	0.0436641
KNPR	Chr2_210873206	Chr5_7137455	6.33114	-0.950749	0.0435814
KNPR	Chr2_210712821	Chr5_7137455	6.33114	-0.950749	0.0435814
KNPR	Chr2_211263116	Chr5_6941327	6.08617	0.927658	0.041931
KNPR	Chr2_211461059	Chr5_6941327	6.0281	0.923263	0.0415394
KNPR	Chr2_216908455	Chr5_7144625	5.94828	-0.925435	0.0410008
KNPR	Chr2_216908455	Chr5_7137455	5.93864	-0.924568	0.0409357
KNPR	Chr2_210873206	Chr5_6941327	5.85919	0.91049	0.0403992
KNPR	Chr2_210712821	Chr5_6941327	5.85919	0.91049	0.0403992
KNPR	Chr2_211263116	Chr5_7383791	5.80984	0.917052	0.0400659
KNPR	Chr2_211461059	Chr5_7383791	5.74793	0.912228	0.0396475
KNPR	Chr2_210873206	Chr5_7383791	5.5931	0.900477	0.0386004
KNPR	Chr2_210712821	Chr5_7383791	5.5931	0.900477	0.0386004
KNPR	Chr2_216908455	Chr5_6941327	5.46348	0.882068	0.037723
KNPR	Chr1_198848770	Chr5_6941327	5.37095	-0.863525	0.0370961
KNPR	Chr2_216908455	Chr5_7383791	5.2232	0.870213	0.0360943
KT	Chr1_131115160	Chr4_3456791	5.17202	1.39152	0.035747
KT	Chr1_214378315	Chr4_190902114	5.02823	-0.830012	0.0347706
KT	Chr1_131115160	Chr4_3179162	5.02045	1.36936	0.0347178
KW	Chr3_233620658	Chr7_125520405	5.54691	2.11082	0.0382878
KW	Chr3_233620658	Chr7_125547415	5.54691	2.11082	0.0382878
KW	Chr3_233620658	Chr7_126298818	5.52556	2.09836	0.0381434
KW	Chr3_233248082	Chr7_125520405	5.4191	2.07548	0.0374223
KW	Chr3_233248082	Chr7_125547415	5.4191	2.07548	0.0374223
KW	Chr3_233620658	Chr7_125165529	5.40901	2.08398	0.037354
KW	Chr1_268208046	Chr5_22416982	5.38848	-2.05189	0.0372149
KW	Chr1_268482555	Chr5_22416982	5.38848	-2.05189	0.0372149
KW	Chr1_268208046	Chr5_21977401	5.38848	-2.05189	0.0372149
KW	Chr1_268482555	Chr5_21977401	5.38848	-2.05189	0.0372149
KW	Chr1_268208046	Chr5_22604972	5.38848	-2.05189	0.0372149
KW	Chr1_268482555	Chr5_22604972	5.38848	-2.05189	0.0372149
KW	Chr1_269926887	Chr5_22416982	5.38383	-2.07445	0.0371834
KW	Chr1_269715813	Chr5_22416982	5.38383	-2.07445	0.0371834
KW	Chr1_269603736	Chr5_22416982	5.38383	-2.07445	0.0371834
KW	Chr1_269073912	Chr5_22416982	5.38383	-2.07445	0.0371834
KW	Chr1_269926887	Chr5_21977401	5.38383	-2.07445	0.0371834
KW	Chr1_269715813	Chr5_21977401	5.38383	-2.07445	0.0371834
KW	Chr1_269603736	Chr5_21977401	5.38383	-2.07445	0.0371834
KW	Chr1_269073912	Chr5_21977401	5.38383	-2.07445	0.0371834
KW	Chr1_269926887	Chr5_22604972	5.38383	-2.07445	0.0371834
KW	Chr1_269715813	Chr5_22604972	5.38383	-2.07445	0.0371834
KW	Chr1_269603736	Chr5_22604972	5.38383	-2.07445	0.0371834
KW	Chr1_269073912	Chr5_22604972	5.38383	-2.07445	0.0371834
KW	Chr1_272123432	Chr5_22416982	5.36635	-2.06009	0.0370649
KW	Chr1_272442307	Chr5_22416982	5.36635	-2.06009	0.0370649
KW	Chr1_272123432	Chr5_21977401	5.36635	-2.06009	0.0370649
KW	Chr1_272442307	Chr5_21977401	5.36635	-2.06009	0.0370649
KW	Chr1_272123432	Chr5_22604972	5.36635	-2.06009	0.0370649
KW	Chr1_272442307	Chr5_22604972	5.36635	-2.06009	0.0370649
KW	Chr3_233248082	Chr7_126298818	5.35223	2.0506	0.0369692
KW	Chr3_233092097	Chr7_125520405	5.31872	2.04045	0.0367421
KW	Chr3_233050669	Chr7_125520405	5.31872	2.04045	0.0367421
KW	Chr3_233092097	Chr7_125547415	5.31872	2.04045	0.0367421
KW	Chr3_233050669	Chr7_125547415	5.31872	2.04045	0.0367421
KW	Chr3_233620658	Chr7_124134155	5.30609	2.05737	0.0366564
KW	Chr1_270123370	Chr5_22416982	5.30341	-2.07224	0.0366382
KW	Chr1_270123370	Chr5_21977401	5.30341	-2.07224	0.0366382
KW	Chr1_270123370	Chr5_22604972	5.30341	-2.07224	0.0366382
KW	Chr3_233248082	Chr7_125165529	5.29859	2.0501	0.0366056
KW	Chr3_233620658	Chr7_127203975	5.28768	2.05405	0.0365316
KW	Chr1_272648854	Chr5_22416982	5.25831	-2.04262	0.0363324
KW	Chr1_272648854	Chr5_21977401	5.25831	-2.04262	0.0363324
KW	Chr1_272648854	Chr5_22604972	5.25831	-2.04262	0.0363324
KW	Chr3_233620658	Chr7_127573640	5.24467	2.02645	0.0362399
KW	Chr3_231645980	Chr7_125520405	5.22411	1.98917	0.0361004
KW	Chr3_231645980	Chr7_125547415	5.22411	1.98917	0.0361004
KW	Chr3_233092097	Chr7_125165529	5.20146	2.01549	0.0359467
KW	Chr3_233050669	Chr7_125165529	5.20146	2.01549	0.0359467
KW	Chr3_231442371	Chr7_125520405	5.19899	1.98216	0.03593
KW	Chr3_231492342	Chr7_125520405	5.19899	1.98216	0.03593
KW	Chr3_231442371	Chr7_125547415	5.19899	1.98216	0.03593
KW	Chr3_231492342	Chr7_125547415	5.19899	1.98216	0.03593
KW	Chr3_233092097	Chr7_126298818	5.18447	2.03285	0.0358315
KW	Chr3_233050669	Chr7_126298818	5.18447	2.03285	0.0358315
KW	Chr3_233620658	Chr7_125938553	5.17734	2.03929	0.0357831
KW	Chr3_233248082	Chr7_124134155	5.1679	2.01608	0.035719
KW	Chr3_231645980	Chr7_125165529	5.16716	1.97179	0.035714
KW	Chr3_231442371	Chr7_125165529	5.143	1.96511	0.03555
KW	Chr3_231492342	Chr7_125165529	5.143	1.96511	0.03555
KW	Chr3_233248082	Chr7_127203975	5.12863	2.0095	0.0354524
KW	Chr3_231645980	Chr7_126298818	5.11762	1.98744	0.0353777
KW	Chr1_270995706	Chr5_22416982	5.11156	-2.01735	0.0353365
KW	Chr1_270995706	Chr5_21977401	5.11156	-2.01735	0.0353365
KW	Chr1_270995706	Chr5_22604972	5.11156	-2.01735	0.0353365
KW	Chr3_233620658	Chr7_127645016	5.10777	1.99544	0.0353108
KW	Chr3_233620658	Chr7_127589147	5.10777	1.99544	0.0353108
KW	Chr3_233248082	Chr7_127573640	5.10249	1.98721	0.035275
KW	Chr3_231442371	Chr7_126298818	5.0949	1.98126	0.0352235
KW	Chr3_231492342	Chr7_126298818	5.0949	1.98126	0.0352235
KW	Chr3_233092097	Chr7_124134155	5.0465	1.97739	0.0348948
KW	Chr3_233050669	Chr7_124134155	5.0465	1.97739	0.0348948
KW	Chr3_233248082	Chr7_125938553	5.03283	1.9997	0.0348019
KW	Chr3_233475275	Chr7_125520405	5.01652	2.00371	0.0346911
KW	Chr3_233475275	Chr7_125547415	5.01652	2.00371	0.0346911
KW	Chr3_231645980	Chr7_124134155	5.01451	1.93075	0.0346775
VW	Chr1_660401	Chr3_226576586	5.28436	-12.1831	0.0365091
VW	Chr1_660401	Chr3_226769587	5.28436	-12.1831	0.0365091
VW	Chr1_742945	Chr3_226576586	5.13555	-12.0251	0.0354994
VW	Chr1_742945	Chr3_226769587	5.13555	-12.0251	0.0354994
HGW	Chr3_168717038	Chr7_79201112	6.22436	-0.81411	0.0428624
HGW	Chr3_170093484	Chr7_79201112	5.73694	-0.782638	0.0395732
HGW	Chr3_169242303	Chr7_79201112	5.69578	-0.779759	0.039295
HGW	Chr3_169316491	Chr7_79201112	5.69578	-0.779759	0.039295
HGW	Chr3_170015303	Chr7_79201112	5.67113	-0.778543	0.0391283
HGW	Chr3_169807999	Chr7_79201112	5.658	-0.777492	0.0390395
HGW	Chr3_169397737	Chr7_79201112	5.60651	-0.77286	0.0386911
HGW	Chr1_193192905	Chr3_185208635	5.20725	0.817981	0.035986
HGW	Chr1_193192905	Chr3_184939933	5.11233	0.807756	0.0353418
HGW	Chr1_193721409	Chr3_185208635	5.10908	0.811099	0.0353197
HGW	Chr1_192968583	Chr3_185208635	5.06193	0.80637	0.0349995
HGW	Chr1_193192905	Chr3_184593801	5.02078	0.801872	0.03472
HGW	Chr1_193721409	Chr3_184939933	5.01995	0.8014	0.0347144
GY	Chr1_297424128	Chr6_165900285	5.29229	4.77737	0.0365628
PH, plant height; EH, ear height; RNPE, row number per ear; KNPR, kernel number per row; KT, kernel thickness; KW, kernel width; KL, kernel length; VW, volume weight; HGW, hundred grain weight; GY, grain yield per plant; LOD, log of odds; Effect, allele effects; PVE, phenotypic variance explained.

## Sheet: Dominance-by-additive
Traits	Peak SNP1	Peak SNP2	LOD	Effect	PVE
PH	Chr1_305468365	Chr3_113481902	5.72466	6.70741	0.0394902
PH	Chr6_166754537	Chr8_180048590	5.61622	-6.68054	0.0387569
PH	Chr6_166754537	Chr8_180913576	5.61622	-6.68054	0.0387569
PH	Chr6_166754537	Chr8_181023046	5.61622	-6.68054	0.0387569
PH	Chr6_166754537	Chr8_180032314	5.45586	-6.59132	0.0376714
PH	Chr6_166587580	Chr8_180048590	5.39093	-6.56599	0.0372315
PH	Chr6_166587580	Chr8_180913576	5.39093	-6.56599	0.0372315
PH	Chr6_166587580	Chr8_181023046	5.39093	-6.56599	0.0372315
PH	Chr6_166754537	Chr8_180563277	5.28595	-6.45631	0.0365199
PH	Chr6_166754537	Chr8_180334237	5.28595	-6.45631	0.0365199
PH	Chr6_166754537	Chr8_180284778	5.28595	-6.45631	0.0365199
PH	Chr6_166754537	Chr8_180685249	5.28595	-6.45631	0.0365199
PH	Chr6_166754537	Chr8_179683376	5.27307	-6.51015	0.0364325
PH	Chr6_166754537	Chr8_179650511	5.27307	-6.51015	0.0364325
PH	Chr6_166587580	Chr8_180032314	5.21038	-6.45474	0.0360073
PH	Chr6_166812072	Chr8_180048590	5.08642	-6.33309	0.0351659
PH	Chr6_166812072	Chr8_180913576	5.08642	-6.33309	0.0351659
PH	Chr6_166812072	Chr8_181023046	5.08642	-6.33309	0.0351659
PH	Chr1_3006323	Chr7_3973704	5.08302	-6.19785	0.0351428
PH	Chr6_166587580	Chr8_180563277	5.07924	-6.35488	0.0351171
PH	Chr6_166587580	Chr8_180334237	5.07924	-6.35488	0.0351171
PH	Chr6_166587580	Chr8_180284778	5.07924	-6.35488	0.0351171
PH	Chr6_166587580	Chr8_180685249	5.07924	-6.35488	0.0351171
PH	Chr1_3169762	Chr7_3973704	5.07827	-6.1759	0.0351105
PH	Chr6_166482319	Chr8_180048590	5.06722	-6.37801	0.0350355
PH	Chr6_166482319	Chr8_180913576	5.06722	-6.37801	0.0350355
PH	Chr6_166482319	Chr8_181023046	5.06722	-6.37801	0.0350355
PH	Chr6_166587580	Chr8_179683376	5.03321	-6.37387	0.0348045
PH	Chr6_166587580	Chr8_179650511	5.03321	-6.37387	0.0348045
PH	Chr6_166812072	Chr8_179567637	5.02015	-6.31098	0.0347157
EH	Chr7_179887014	Chr10_149806775	5.10935	2.09108	0.0353215
EH	Chr7_179887014	Chr10_149761986	5.04534	2.07748	0.0348869
EH	Chr7_179887014	Chr10_149771687	5.02801	2.07425	0.0347692
RNPE	Chr1_17945477	Chr4_155040877	5.80768	0.237662	0.0400513
RNPE	Chr1_17945477	Chr4_153918329	5.74575	0.236345	0.0396328
RNPE	Chr1_17945477	Chr4_154255944	5.74575	0.236345	0.0396328
RNPE	Chr1_17945477	Chr4_154488571	5.696	0.235393	0.0392964
RNPE	Chr1_17945477	Chr4_154633515	5.696	0.235393	0.0392964
RNPE	Chr1_17945477	Chr3_226576586	5.14252	0.224496	0.0355468
RNPE	Chr1_17945477	Chr3_226769587	5.14252	0.224496	0.0355468
RNPE	Chr1_14555419	Chr4_153918329	5.04051	0.223556	0.0348541
RNPE	Chr1_14555419	Chr4_154255944	5.04051	0.223556	0.0348541
KNPR	Chr1_286584876	Chr5_195640474	5.01638	-0.920017	0.0346901
KNPR	Chr1_286680671	Chr5_195640474	5.01638	-0.920017	0.0346901
KT	Chr4_190902114	Chr7_167509117	5.59136	0.873685	0.0385887
KT	Chr4_190902114	Chr7_166721608	5.52061	0.857064	0.0381098
KT	Chr4_190902114	Chr7_167225090	5.46577	0.857349	0.0377385
KT	Chr4_190902114	Chr7_167278919	5.29425	0.845409	0.0365761
KT	Chr4_190902114	Chr7_165634459	5.24583	0.835999	0.0362478
KT	Chr4_193980941	Chr7_166721608	5.22407	-0.837232	0.0361002
KT	Chr4_190902114	Chr7_167036413	5.18461	0.832224	0.0358324
KT	Chr1_131115160	Chr4_3456791	5.17202	1.39152	0.035747
KT	Chr4_181357928	Chr7_167509117	5.10125	-0.797403	0.0352666
KT	Chr4_181357928	Chr7_167225090	5.09104	-0.792588	0.0351973
KT	Chr1_131115160	Chr4_3179162	5.02045	1.36936	0.0347178
KW	Chr3_233620658	Chr7_125520405	5.54691	-2.11082	0.0382878
KW	Chr3_233620658	Chr7_125547415	5.54691	-2.11082	0.0382878
KW	Chr3_233620658	Chr7_126298818	5.52556	-2.09836	0.0381434
KW	Chr3_233248082	Chr7_125520405	5.4191	-2.07548	0.0374223
KW	Chr3_233248082	Chr7_125547415	5.4191	-2.07548	0.0374223
KW	Chr3_233620658	Chr7_125165529	5.40901	-2.08398	0.037354
KW	Chr1_268208046	Chr5_22416982	5.38848	2.05189	0.0372149
KW	Chr1_268482555	Chr5_22416982	5.38848	2.05189	0.0372149
KW	Chr1_268208046	Chr5_21977401	5.38848	2.05189	0.0372149
KW	Chr1_268482555	Chr5_21977401	5.38848	2.05189	0.0372149
KW	Chr1_268208046	Chr5_22604972	5.38848	2.05189	0.0372149
KW	Chr1_268482555	Chr5_22604972	5.38848	2.05189	0.0372149
KW	Chr1_269926887	Chr5_22416982	5.38383	2.07445	0.0371834
KW	Chr1_269715813	Chr5_22416982	5.38383	2.07445	0.0371834
KW	Chr1_269603736	Chr5_22416982	5.38383	2.07445	0.0371834
KW	Chr1_269073912	Chr5_22416982	5.38383	2.07445	0.0371834
KW	Chr1_269926887	Chr5_21977401	5.38383	2.07445	0.0371834
KW	Chr1_269715813	Chr5_21977401	5.38383	2.07445	0.0371834
KW	Chr1_269603736	Chr5_21977401	5.38383	2.07445	0.0371834
KW	Chr1_269073912	Chr5_21977401	5.38383	2.07445	0.0371834
KW	Chr1_269926887	Chr5_22604972	5.38383	2.07445	0.0371834
KW	Chr1_269715813	Chr5_22604972	5.38383	2.07445	0.0371834
KW	Chr1_269603736	Chr5_22604972	5.38383	2.07445	0.0371834
KW	Chr1_269073912	Chr5_22604972	5.38383	2.07445	0.0371834
KW	Chr1_272123432	Chr5_22416982	5.36635	2.06009	0.0370649
KW	Chr1_272442307	Chr5_22416982	5.36635	2.06009	0.0370649
KW	Chr1_272123432	Chr5_21977401	5.36635	2.06009	0.0370649
KW	Chr1_272442307	Chr5_21977401	5.36635	2.06009	0.0370649
KW	Chr1_272123432	Chr5_22604972	5.36635	2.06009	0.0370649
KW	Chr1_272442307	Chr5_22604972	5.36635	2.06009	0.0370649
KW	Chr3_233248082	Chr7_126298818	5.35223	-2.0506	0.0369692
KW	Chr3_233092097	Chr7_125520405	5.31872	-2.04045	0.0367421
KW	Chr3_233050669	Chr7_125520405	5.31872	-2.04045	0.0367421
KW	Chr3_233092097	Chr7_125547415	5.31872	-2.04045	0.0367421
KW	Chr3_233050669	Chr7_125547415	5.31872	-2.04045	0.0367421
KW	Chr3_233620658	Chr7_124134155	5.30609	-2.05737	0.0366564
KW	Chr1_270123370	Chr5_22416982	5.30341	2.07224	0.0366382
KW	Chr1_270123370	Chr5_21977401	5.30341	2.07224	0.0366382
KW	Chr1_270123370	Chr5_22604972	5.30341	2.07224	0.0366382
KW	Chr3_233248082	Chr7_125165529	5.29859	-2.0501	0.0366056
KW	Chr3_233620658	Chr7_127203975	5.28768	-2.05405	0.0365316
KW	Chr1_272648854	Chr5_22416982	5.25831	2.04262	0.0363324
KW	Chr1_272648854	Chr5_21977401	5.25831	2.04262	0.0363324
KW	Chr1_272648854	Chr5_22604972	5.25831	2.04262	0.0363324
KW	Chr3_233620658	Chr7_127573640	5.24467	-2.02645	0.0362399
KW	Chr3_231645980	Chr7_125520405	5.22411	-1.98917	0.0361004
KW	Chr3_231645980	Chr7_125547415	5.22411	-1.98917	0.0361004
KW	Chr3_233092097	Chr7_125165529	5.20146	-2.01549	0.0359467
KW	Chr3_233050669	Chr7_125165529	5.20146	-2.01549	0.0359467
KW	Chr3_231442371	Chr7_125520405	5.19899	-1.98216	0.03593
KW	Chr3_231492342	Chr7_125520405	5.19899	-1.98216	0.03593
KW	Chr3_231442371	Chr7_125547415	5.19899	-1.98216	0.03593
KW	Chr3_231492342	Chr7_125547415	5.19899	-1.98216	0.03593
KW	Chr3_233092097	Chr7_126298818	5.18447	-2.03285	0.0358315
KW	Chr3_233050669	Chr7_126298818	5.18447	-2.03285	0.0358315
KW	Chr3_233620658	Chr7_125938553	5.17734	-2.03929	0.0357831
KW	Chr3_233248082	Chr7_124134155	5.1679	-2.01608	0.035719
KW	Chr3_231645980	Chr7_125165529	5.16716	-1.97179	0.035714
KW	Chr3_231442371	Chr7_125165529	5.143	-1.96511	0.03555
KW	Chr3_231492342	Chr7_125165529	5.143	-1.96511	0.03555
KW	Chr3_233248082	Chr7_127203975	5.12863	-2.0095	0.0354524
KW	Chr3_231645980	Chr7_126298818	5.11762	-1.98744	0.0353777
KW	Chr1_270995706	Chr5_22416982	5.11156	2.01735	0.0353365
KW	Chr1_270995706	Chr5_21977401	5.11156	2.01735	0.0353365
KW	Chr1_270995706	Chr5_22604972	5.11156	2.01735	0.0353365
KW	Chr3_233620658	Chr7_127645016	5.10777	-1.99544	0.0353108
KW	Chr3_233620658	Chr7_127589147	5.10777	-1.99544	0.0353108
KW	Chr3_233248082	Chr7_127573640	5.10249	-1.98721	0.035275
KW	Chr3_231442371	Chr7_126298818	5.0949	-1.98126	0.0352235
KW	Chr3_231492342	Chr7_126298818	5.0949	-1.98126	0.0352235
KW	Chr3_233092097	Chr7_124134155	5.0465	-1.97739	0.0348948
KW	Chr3_233050669	Chr7_124134155	5.0465	-1.97739	0.0348948
KW	Chr3_233248082	Chr7_125938553	5.03283	-1.9997	0.0348019
KW	Chr3_233475275	Chr7_125520405	5.01652	-2.00371	0.0346911
KW	Chr3_233475275	Chr7_125547415	5.01652	-2.00371	0.0346911
KW	Chr3_231645980	Chr7_124134155	5.01451	-1.93075	0.0346775
PH, plant height; EH, ear height; RNPE, row number per ear; KNPR, kernel number per row; KT, kernel thickness; KW, kernel width; KL, kernel length; VW, volume weight; HGW, hundred grain weight; GY, grain yield per plant; LOD, log of odds; Effect, allele effects; PVE, phenotypic variance explained.

## Sheet: Dominance-by-dominance
Traits	Peak SNP1	Peak SNP2	LOD	Effect	PVE
PH	Chr1_305468365	Chr3_113481902	5.72466	-6.70741	0.0394902
PH	Chr6_166754537	Chr8_180048590	5.61622	-6.68054	0.0387569
PH	Chr6_166754537	Chr8_180913576	5.61622	-6.68054	0.0387569
PH	Chr6_166754537	Chr8_181023046	5.61622	-6.68054	0.0387569
PH	Chr6_166754537	Chr8_180032314	5.45586	-6.59132	0.0376714
PH	Chr6_166587580	Chr8_180048590	5.39093	-6.56599	0.0372315
PH	Chr6_166587580	Chr8_180913576	5.39093	-6.56599	0.0372315
PH	Chr6_166587580	Chr8_181023046	5.39093	-6.56599	0.0372315
PH	Chr6_166754537	Chr8_180563277	5.28595	-6.45631	0.0365199
PH	Chr6_166754537	Chr8_180334237	5.28595	-6.45631	0.0365199
PH	Chr6_166754537	Chr8_180284778	5.28595	-6.45631	0.0365199
PH	Chr6_166754537	Chr8_180685249	5.28595	-6.45631	0.0365199
PH	Chr6_166754537	Chr8_179683376	5.27307	-6.51015	0.0364325
PH	Chr6_166754537	Chr8_179650511	5.27307	-6.51015	0.0364325
PH	Chr6_166587580	Chr8_180032314	5.21038	-6.45474	0.0360073
PH	Chr6_166812072	Chr8_180048590	5.08642	-6.33309	0.0351659
PH	Chr6_166812072	Chr8_180913576	5.08642	-6.33309	0.0351659
PH	Chr6_166812072	Chr8_181023046	5.08642	-6.33309	0.0351659
PH	Chr1_3006323	Chr7_3973704	5.08302	-6.19785	0.0351428
PH	Chr6_166587580	Chr8_180563277	5.07924	-6.35488	0.0351171
PH	Chr6_166587580	Chr8_180334237	5.07924	-6.35488	0.0351171
PH	Chr6_166587580	Chr8_180284778	5.07924	-6.35488	0.0351171
PH	Chr6_166587580	Chr8_180685249	5.07924	-6.35488	0.0351171
PH	Chr1_3169762	Chr7_3973704	5.07827	-6.1759	0.0351105
PH	Chr6_166482319	Chr8_180048590	5.06722	-6.37801	0.0350355
PH	Chr6_166482319	Chr8_180913576	5.06722	-6.37801	0.0350355
PH	Chr6_166482319	Chr8_181023046	5.06722	-6.37801	0.0350355
PH	Chr6_166587580	Chr8_179683376	5.03321	-6.37387	0.0348045
PH	Chr6_166587580	Chr8_179650511	5.03321	-6.37387	0.0348045
PH	Chr6_166812072	Chr8_179567637	5.02015	-6.31098	0.0347157
KT	Chr1_131115160	Chr4_3456791	5.17202	1.39152	0.035747
KT	Chr1_131115160	Chr4_3179162	5.02045	1.36936	0.0347178
KW	Chr3_233620658	Chr7_125520405	5.54691	2.11082	0.0382878
KW	Chr3_233620658	Chr7_125547415	5.54691	2.11082	0.0382878
KW	Chr3_233620658	Chr7_126298818	5.52556	2.09836	0.0381434
KW	Chr3_233248082	Chr7_125520405	5.4191	2.07548	0.0374223
KW	Chr3_233248082	Chr7_125547415	5.4191	2.07548	0.0374223
KW	Chr3_233620658	Chr7_125165529	5.40901	2.08398	0.037354
KW	Chr1_268208046	Chr5_22416982	5.38848	2.05189	0.0372149
KW	Chr1_268482555	Chr5_22416982	5.38848	2.05189	0.0372149
KW	Chr1_268208046	Chr5_21977401	5.38848	2.05189	0.0372149
KW	Chr1_268482555	Chr5_21977401	5.38848	2.05189	0.0372149
KW	Chr1_268208046	Chr5_22604972	5.38848	2.05189	0.0372149
KW	Chr1_268482555	Chr5_22604972	5.38848	2.05189	0.0372149
KW	Chr1_269926887	Chr5_22416982	5.38383	2.07445	0.0371834
KW	Chr1_269715813	Chr5_22416982	5.38383	2.07445	0.0371834
KW	Chr1_269603736	Chr5_22416982	5.38383	2.07445	0.0371834
KW	Chr1_269073912	Chr5_22416982	5.38383	2.07445	0.0371834
KW	Chr1_269926887	Chr5_21977401	5.38383	2.07445	0.0371834
KW	Chr1_269715813	Chr5_21977401	5.38383	2.07445	0.0371834
KW	Chr1_269603736	Chr5_21977401	5.38383	2.07445	0.0371834
KW	Chr1_269073912	Chr5_21977401	5.38383	2.07445	0.0371834
KW	Chr1_269926887	Chr5_22604972	5.38383	2.07445	0.0371834
KW	Chr1_269715813	Chr5_22604972	5.38383	2.07445	0.0371834
KW	Chr1_269603736	Chr5_22604972	5.38383	2.07445	0.0371834
KW	Chr1_269073912	Chr5_22604972	5.38383	2.07445	0.0371834
KW	Chr1_272123432	Chr5_22416982	5.36635	2.06009	0.0370649
KW	Chr1_272442307	Chr5_22416982	5.36635	2.06009	0.0370649
KW	Chr1_272123432	Chr5_21977401	5.36635	2.06009	0.0370649
KW	Chr1_272442307	Chr5_21977401	5.36635	2.06009	0.0370649
KW	Chr1_272123432	Chr5_22604972	5.36635	2.06009	0.0370649
KW	Chr1_272442307	Chr5_22604972	5.36635	2.06009	0.0370649
KW	Chr3_233248082	Chr7_126298818	5.35223	2.0506	0.0369692
KW	Chr3_233092097	Chr7_125520405	5.31872	2.04045	0.0367421
KW	Chr3_233050669	Chr7_125520405	5.31872	2.04045	0.0367421
KW	Chr3_233092097	Chr7_125547415	5.31872	2.04045	0.0367421
KW	Chr3_233050669	Chr7_125547415	5.31872	2.04045	0.0367421
KW	Chr3_233620658	Chr7_124134155	5.30609	2.05737	0.0366564
KW	Chr1_270123370	Chr5_22416982	5.30341	2.07224	0.0366382
KW	Chr1_270123370	Chr5_21977401	5.30341	2.07224	0.0366382
KW	Chr1_270123370	Chr5_22604972	5.30341	2.07224	0.0366382
KW	Chr3_233248082	Chr7_125165529	5.29859	2.0501	0.0366056
KW	Chr3_233620658	Chr7_127203975	5.28768	2.05405	0.0365316
KW	Chr1_272648854	Chr5_22416982	5.25831	2.04262	0.0363324
KW	Chr1_272648854	Chr5_21977401	5.25831	2.04262	0.0363324
KW	Chr1_272648854	Chr5_22604972	5.25831	2.04262	0.0363324
KW	Chr3_233620658	Chr7_127573640	5.24467	2.02645	0.0362399
KW	Chr3_231645980	Chr7_125520405	5.22411	1.98917	0.0361004
KW	Chr3_231645980	Chr7_125547415	5.22411	1.98917	0.0361004
KW	Chr3_233092097	Chr7_125165529	5.20146	2.01549	0.0359467
KW	Chr3_233050669	Chr7_125165529	5.20146	2.01549	0.0359467
KW	Chr3_231442371	Chr7_125520405	5.19899	1.98216	0.03593
KW	Chr3_231492342	Chr7_125520405	5.19899	1.98216	0.03593
KW	Chr3_231442371	Chr7_125547415	5.19899	1.98216	0.03593
KW	Chr3_231492342	Chr7_125547415	5.19899	1.98216	0.03593
KW	Chr3_233092097	Chr7_126298818	5.18447	2.03285	0.0358315
KW	Chr3_233050669	Chr7_126298818	5.18447	2.03285	0.0358315
KW	Chr3_233620658	Chr7_125938553	5.17734	2.03929	0.0357831
KW	Chr3_233248082	Chr7_124134155	5.1679	2.01608	0.035719
KW	Chr3_231645980	Chr7_125165529	5.16716	1.97179	0.035714
KW	Chr3_231442371	Chr7_125165529	5.143	1.96511	0.03555
KW	Chr3_231492342	Chr7_125165529	5.143	1.96511	0.03555
KW	Chr3_233248082	Chr7_127203975	5.12863	2.0095	0.0354524
KW	Chr3_231645980	Chr7_126298818	5.11762	1.98744	0.0353777
KW	Chr1_270995706	Chr5_22416982	5.11156	2.01735	0.0353365
KW	Chr1_270995706	Chr5_21977401	5.11156	2.01735	0.0353365
KW	Chr1_270995706	Chr5_22604972	5.11156	2.01735	0.0353365
KW	Chr3_233620658	Chr7_127645016	5.10777	1.99544	0.0353108
KW	Chr3_233620658	Chr7_127589147	5.10777	1.99544	0.0353108
KW	Chr3_233248082	Chr7_127573640	5.10249	1.98721	0.035275
KW	Chr3_231442371	Chr7_126298818	5.0949	1.98126	0.0352235
KW	Chr3_231492342	Chr7_126298818	5.0949	1.98126	0.0352235
KW	Chr3_233092097	Chr7_124134155	5.0465	1.97739	0.0348948
KW	Chr3_233050669	Chr7_124134155	5.0465	1.97739	0.0348948
KW	Chr3_233248082	Chr7_125938553	5.03283	1.9997	0.0348019
KW	Chr3_233475275	Chr7_125520405	5.01652	2.00371	0.0346911
KW	Chr3_233475275	Chr7_125547415	5.01652	2.00371	0.0346911
KW	Chr3_231645980	Chr7_124134155	5.01451	1.93075	0.0346775
VW	Chr1_660401	Chr3_226576586	5.28436	12.1831	0.0365091
VW	Chr1_660401	Chr3_226769587	5.28436	12.1831	0.0365091
VW	Chr1_742945	Chr3_226576586	5.13555	12.0251	0.0354994
VW	Chr1_742945	Chr3_226769587	5.13555	12.0251	0.0354994
PH, plant height; EH, ear height; RNPE, row number per ear; KNPR, kernel number per row; KT, kernel thickness; KW, kernel width; KL, kernel length; VW, volume weight; HGW, hundred grain weight; GY, grain yield per plant; LOD, log of odds; Effect, allele effects; PVE, phenotypic variance explained.
