# Supplementary material for: Genetic Dissection of Hybrid Performance and Heterosis for Yield-Related Traits in Maize
Source: Front Plant Sci. 2021 Nov 30;12:774478. doi: 10.3389/fpls.2021.774478 (PMC8670227; doi:10.3389/fpls.2021.774478)
Supplement: Supplementary Table 9 — Correlations between the number of harbored favorable quantitative trait loci (QTL) and hybrid performance for 10 traits in Chang7-2 × RIL (TC) and Mo17 × RIL (TM) population, respectively. [file Table_9.docx]

**Supplementary Table 9 |** Correlations between the number of harbored favorable quantitative trait loci (QTL) and hybrid performance for 10 traits in Chang7-2 × RIL (TC) and Mo17 × RIL (TM) population, respectively

| Population | Traits | *r*1 | *r*2 | *r*3 |
| --- | --- | --- | --- | --- |
| TC | PH | 0.29** | 0.44** | 0.51** |
|  | EH | 0.49** | 0.13* | 0.48** |
|  | RNPE | 0.20** | 0.45** | 0.48** |
|  | KNPR | 0.26** | / | 0.26** |
|  | KT | 0.25** | 0.43** | 0.47** |
|  | KW | 0.35** | 0.23** | 0.40** |
|  | KL | 0.30** | 0.30** | 0.41** |
|  | VW | 0.37** | 0.26** | 0.45** |
|  | HGW | 0.19** | 0.49** | 0.52** |
|  | GY | 0.16** | 0.43** | 0.41** |
| TM | PH | 0.33** | 0.24** | 0.39** |
|  | EH | 0.32** | 0.35** | 0.48** |
|  | RNPE | 0.35** | 0.21** | 0.36** |
|  | KNPR | 0.20** | 0.24** | 0.30** |
|  | KT | 0.30** | 0.46** | 0.51** |
|  | KW | 0.36** | / | 0.36** |
|  | KL | 0.38** | 0.13* | 0.37** |
|  | VW | / | 0.33** | 0.33** |
|  | HGW | 0.46** | 0.40** | 0.54** |
|  | GY | 0.42** | 0.25** | 0.47** |

*r1*, the correlation between the number of favorable homozygous QTL and hybrid performance in TC and TM;

*r2*, the correlation between the number of favorable heterozygous QTL in TM and hybrid performance;

*r3*, the correlation between the number of all favorable QTL in TM and hybrid performance.

*, significant at the 0.05 level; **, significant at 0.01 level; /, the correlations could not be calculated because the corresponding QTL could not be found. PH, plant height; EH, ear height; RNPE, row number per ear; KNPR, kernel number per row; KT, kernel thickness; KW, kernel width; KL, kernel length; VW, volume weight; HGW, hundred grain weight; GY, grain yield per plant.
